# Supplementary material
Source: bioRxiv or medRxiv preprint supplement (https://www.biorxiv.org/highwire/filestream/47047/field_highwire_adjunct_files/4/137695-4.pdf)

**A***frzX*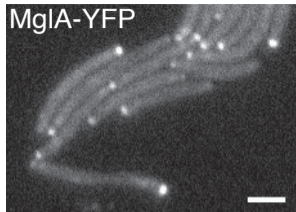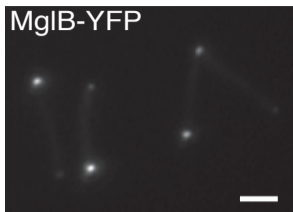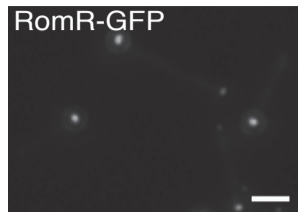**B**

FrzZ-GFP

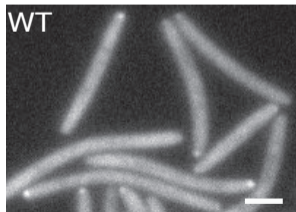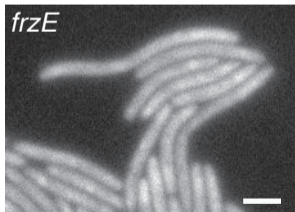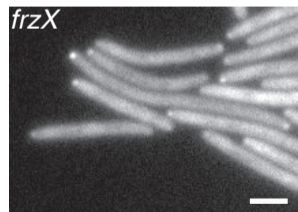

Supplement: Supplementary file [file 137695-4.pdf]
